# Supplementary material for: Proteolytic Processing of Plant Proteins by Potyvirus NIa Proteases
Source: PubMed Central journal article supplement (PMC8791256; doi:10.1128/jvi.01444-21), 2022-01-26
Supplement: jvi.01444-21-s0002.pdf [file jvi.01444-21-s0002.pdf]

**Table S1 .** Consensus cleavage site sequence recognized by the PPV N1a protease derived from analysis of seven polyprotein cleavage sites

| <b>Cleavage sites</b>       | <b>P6</b>                 | <b>P5</b>               | <b>P4</b>       | <b>P3</b>             | <b>P2</b>             | <b>P1</b>          | <b>P1'</b>        |
|-----------------------------|---------------------------|-------------------------|-----------------|-----------------------|-----------------------|--------------------|-------------------|
| <b>P3-6K1</b>               | Q220*, S1                 | V221                    | V221            | V207, L12             | H221                  | Q221               | S220, N1          |
| <b>6K1-CI</b>               | Q195, H22, R4             | T114, A97, S8, P2       | V221            | H217, Q2, R2          | H221                  | Q221               | S217, N4          |
| <b>CI-6K2</b>               | E221                      | C221                    | V221            | H220, Q1              | H221                  | Q221               | T210, S7, N4      |
| <b>6K2-VPg</b>              | E220, D1                  | E218, G3                | V220, A1        | V177, A24, T12, I8    | H221                  | Q220, P1           | G221              |
| <b>VPg-Pro</b>              | E163, G54, D1, V1, K1, R1 | E221                    | V221            | D189, G32             | H221                  | E220, D1           | S220, G1          |
| <b>Pro-N1b</b>              | E206, D14, G1             | F185, T21, I11, V4      | V221            | Y219, H2              | N114, T106, A1        | Q221               | S217, A4          |
| <b>N1b-CP</b>               | N220, D1                  | I130, V91               | V221            | V162, I40, T9, M9, A1 | H221                  | Q221               | A217, V2, T2      |
| <b>Consensus sequence**</b> | <b>E, q, n</b>            | <b>e, v, c, f, t, i</b> | <b><u>V</u></b> | <b>v, h, y, d</b>     | <b><u>H</u>, n, t</b> | <b><u>Q</u>, e</b> | <b>S, g, a, t</b> |

\* 221 full PPV genome sequences were used to assess the conserved sequence at the seven cleavage sites of the polyproteins that are processed by the N1a protease. Numbers indicate how many sequences have a specific amino acid at the corresponding position of the cleavage site (e.g. 220 of 221 sequences have Q in the P6 position of the P3-6K1 cleavage site).

\*\* Amino acids in uppercase letters are predominant at this position for all or most cleavage sites, underlined amino acids are the most conserved at this position.

**Table S2.** Consensus cleavage site sequence recognized by the TuMV NIa protease derived from analysis of seven polyprotein cleavage sites

| Cleavage sites              | P6                          | P5                                       | P4              | P3                                  | P2                 | P1                 | P1'               |
|-----------------------------|-----------------------------|------------------------------------------|-----------------|-------------------------------------|--------------------|--------------------|-------------------|
| <b>P3-6K1</b>               | K468*, R5, E4, Q1           | A330, V91, E18, T13, S12, L8, P4, M1, I1 | V478            | V427, T16, I16, A18, G4, K4, E2, M1 | H478               | Q477, D1           | A470,             |
| <b>6K1-CI</b>               | P478                        | T461, N10, A4, S3                        | V478            | Y472, H6                            | H478               | Q478               | T375, A103        |
| <b>CI-6K2</b>               | E477, G1                    | A478                                     | V478            | H478                                | H478               | Q478               | N346, S132        |
| <b>6K2-VPg</b>              | E478                        | P474, S3, H1                             | V478            | T379, V72, I21, A6                  | H478               | E478               | A476, S2          |
| <b>VPg-Pro</b>              | V342, I116, T10, A6         | P446, S25, Q4, L3                        | V478            | D476, G2                            | H478               | E478               | S478              |
| <b>Pro-NIb</b>              | T474, M4                    | A474, P2, V2                             | V478            | Y478                                | A478               | Q478               | T476, M2          |
| <b>NIb-CP</b>               | V342, A110, M18, T7, I4, E1 | C452, R21, G3, S1, F1                    | V475, A3        | Y475, C3                            | H475, S3           | Q475, R3           | A477, T1          |
| <b>Consensus sequence**</b> | <b>e, p, v, k, t</b>        | <b>a, p, t, c</b>                        | <b><u>v</u></b> | <b>Y, v, h, t, d</b>                | <b><u>H, a</u></b> | <b><u>Q, e</u></b> | <b>A, t, n, s</b> |

\* 478 full TuMV genome sequences were used to assess the conserved sequence at the seven cleavage sites of the polyprotein that are processed by the NIa protease. Numbers indicate how many sequences have a specific amino acid at the corresponding position of the cleavage site (e.g., 468 of 478 sequences have a K in the P6 position of the P3-6K1 cleavage site).

\*\*Amino acids in uppercase letter are predominant at this position for all or most cleavage sites, underlined amino acids are the most conserved at this position.

**Table S3.** Consensus cleavage site sequence recognized by the TEV N1a protease derived from analysis of seven polyprotein cleavage sites

| Cleavage sites              | P6       | P5                   | P4             | P3              | P2                   | P1           | P1'            |
|-----------------------------|----------|----------------------|----------------|-----------------|----------------------|--------------|----------------|
| <b>P3-6K1</b>               | E13*     | D13                  | L13            | V10, I3         | E13                  | Q13          | A13            |
| <b>6K1-CI</b>               | E13      | I10, V3              | I12, V1        | Y13             | T13                  | Q13          | S13            |
| <b>CI-6K2</b>               | E13      | T13                  | I12, V1        | Y13             | L13                  | Q13          | S13            |
| <b>6K2-VPg</b>              | E13      | P13                  | V13            | Y13             | F13                  | Q13          | G13            |
| <b>VPg-Pro</b>              | E13      | D10, E3              | L13            | T12, M1         | F13                  | E13          | G13            |
| <b>Pro-N1b</b>              | E13      | L13                  | V13            | Y13             | S13                  | Q13          | G13            |
| <b>N1b-CP</b>               | E13      | T6, N4, A3           | L13            | Y13             | F13                  | Q13          | S12, G1        |
| <b>Consensus sequence**</b> | <u>E</u> | <b>d, t, p, l, i</b> | <b>L, V, I</b> | <u>Y</u> , v, t | <b>F, e, l, s, t</b> | <u>Q</u> , e | <b>G, S, a</b> |

\* 13 full TEV genome sequences were used to assess the conserved sequence at the seven cleavage sites of the polyprotein that are processed by the N1a protease. Numbers indicate how many sequences have a specific amino acid at the corresponding position of the cleavage site (e.g., 13 of 13 sequences have a E in the P6 position of the P3-6K1 cleavage site).

\*\*Amino acids in uppercase letter are predominant at this position for all or most cleavage sites, underlined amino acids are the most conserved at this position



## A >PPV VPg-Pro-Nib-CP partial polyprotein

GFNRRQRQKLKFRQARDNRMAREVYGDSTMEDYFGSAYSKKGKSGKTRGMGTRKRFVNMVGYDPTDYNFVRFVDPLTGHTLDEPLMD  
INLVQEHFSQIRNDYIGDDKITMQHIMSNPGIVAYYIKDATQKALKVDLTPHNPLRVCDKTATIAGFPEREFELRQTGHVPVVEPNAIPKI  
NEEGDEEVDHESKSLFRGLRDYNPIASSICQLNNSGARQSEMFLGFGGLIVTNQHLFKRNDGELTIRSHHGFEVVKDKTKLKLPCCKGR  
DIVIIRLPKDFPFPKRLQFRTPPTTEDRVCLIGSNFQTKSISSTMSETSATYPVDNSHFVKHWISTKDGHCGLPIVSTRDGSILGLHSLAN  
STNTQNFYAAFPDNFETTYLSNQDNDNWKQWRYNPDEVCSGLQLKRDIPQSPFTICKLLTDLDGEFVYTQSKTTHWLRDKLEGNLKA  
ACPGQLVTKHVVKGKCTLFETYLTHPEEHEFFRPLMGAYQKSALNKDAYVKDLMKYSKPIVVGAVDCDQFERAVDVVISMLISKGFEECN  
YVTDPDIDFISALNMKAAVGALYSGKKRDYFKNVSDQDKESFVRASCKRLFMGKKGWVNGSLKAEALRPKEKVEANKTRSFSTAAPIDTLLGGK  
VCVDDFNNQFYSLNLHCPWSVGMTKFRGGWDKLLRALPEGWIYCDADGSQFDSSSPYLINAVLNIRLAFMEEWDIGEQLSNLYTEIVYT  
PIATPDGTIVKKFKGNNSGQPSTVVDNTLMVILAMTYSLKLGYPDTHDCICRYFVNGDDLVLAVHPAYESIYDELQEHFSQLGLNYTFA  
TKTENKEELWFMSHGKGLYDDMYIPKLEPERIVSILEWDRSNEPIHRLEAICASMVEAWGYKELLREIRKFYSWVLEQAPYNALSKDGKAP  
YIAETALKKLYTDTEASETEIERYLEAFYDDINDDGESNVVHQADEREDEEEVDAGKPIVVTAPAATSPILQPPPIQAPARTTAPMFPN  
IFTPATTQPATKVPQVSGPQLQTFGTYGNEDASPSNSNALVNTNRDRDVDAGSIGFTTVPRLKAMTSKLSLPKVKGKAIMNHLHLAHS  
AQVDLSNTRAPQSCFQTYEGVKRDYDVTDEMSIILNGLMVVCIENGTSPIINGMVMMDGETQVEYPIKPLLDHAKPTFRQIMAHFSNV  
AEAYIEKRNYEKAYMPRYGIQRNLTDYSLARYAFDFYEMTSTTPVRAREAHIQMKAALRNQNRFLGLDGNVGTQEEDTERHTAGDVNRN  
MHNLLGVRGV

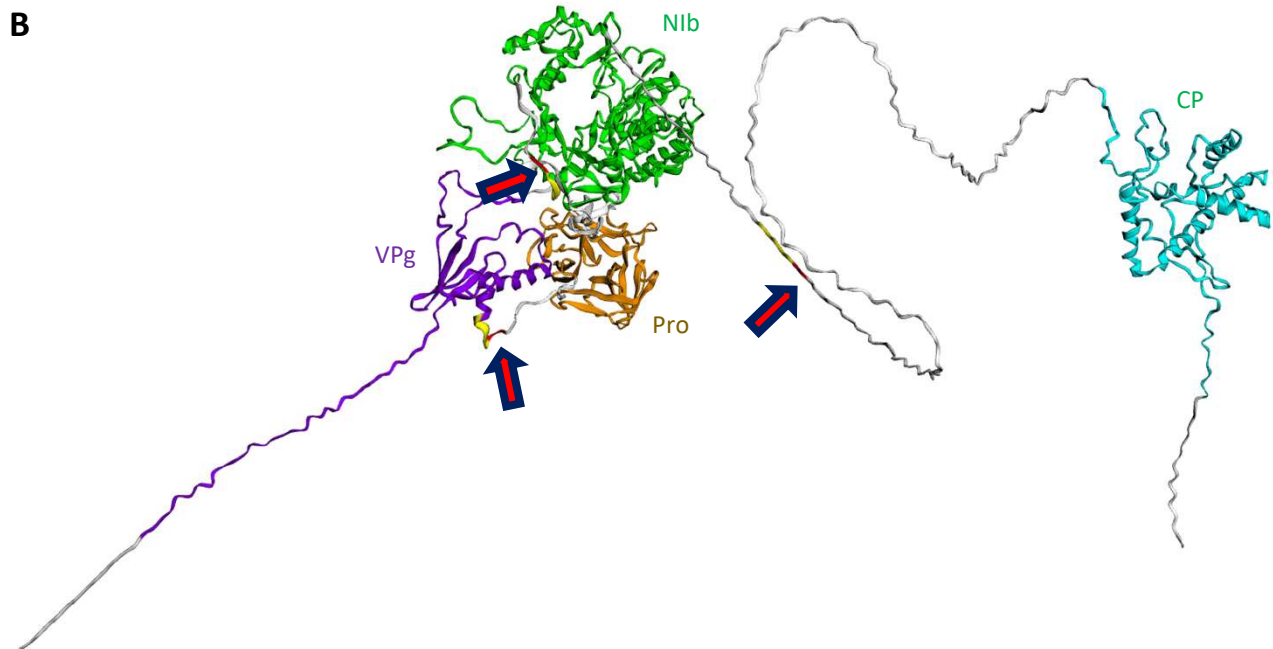

**Figure S1. Structural model of the partial viral polyprotein including the Nla-VPg, Nla-Pro, Nib and CP domains** (A) Sequence of the partial polyprotein. Regions of the polyprotein with 3D structure predicted with a high degree of confidence are underlined (VPg in purple, Pro in brown, Nib in green and CP in blue). Letters highlighted in yellow correspond to the P6 to P1' positions of the predicted cleavage sites with the P1 and P1' positions underlined in red. (B) Structural model of the partial polyprotein predicted using Phyre2 (see Materials and Methods). The degree of confidence in the model varied with the region of the polyprotein. The VPg domain (highlighted in purple) was modeled with a very high degree of confidence (100%) based in part on the solved structure of the VPg from potato virus Y (pdb: 6NFW). The Pro and Nib domains (highlighted in brown and green, respectively) were also modeled with a very high degree of confidence (100%) based in part on the solved structure of the 3CD (Pro-Pol) of poliovirus (pdb: 2IJD). The CP domain (highlighted in brown) was modeled with a medium degree of confidence (74%) based in part on the solved structure of the CP from turnip mosaic virus (pdb: 6T34). The position of the predicted cleavage sites (P6 to P2 position highlighted in yellow; P1 and P1' positions highlighted in red) are shown with the red arrow. They are contained in flexible region of the polyprotein linking the different domains. Please note that the exact positioning of these linkers within the 3D structure of the protein could only be modeled *ab silico* with a low degree of confidence.

**A** >AtKan1

```

MSMEGVFLEKTKTNTTTTLPDLSLHISLPDIHQYHHNESSKESRRSSQLENNRSSNFELSLSHHNHPTARIFHCPDRR
TLNLPHQQHYNNPIINGVHQRVDESEISNLHRPIRGI PVYHNRSFPFHQQNSLPSLGGDMDQISILNSSSGYNNAYRS
LQSSPRLKGVPLHHHHHHNQQYGVVGSDDSSSPHHHHHHHGMIRSRFLPKMPTKRSMRAPRMRWTSSLHARFVHAVELLG
GHERATPKSVLELMDVKDLTLAHVKSHLOMYRTVKTTNKPAASSDGSGEEMGINGNEVHHOSSTDQRAQSDDTSLHQET
DISSTQPRWSNSSRETWPLSNCCSSDIDTMIRTSSTSMISHYQRSSIQNQEQRSNDQAKRCGNLSCENPSLEFTLGRPDW
HEK

```

**B**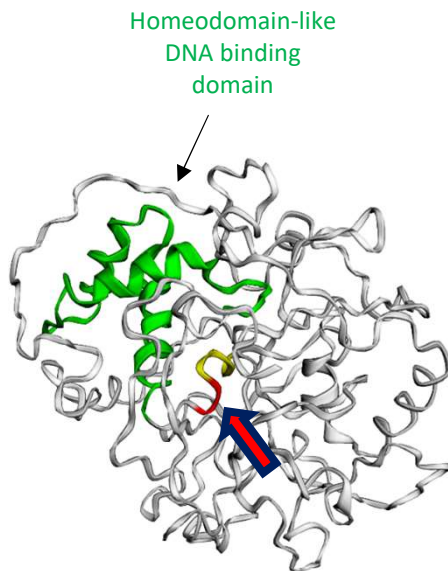**C**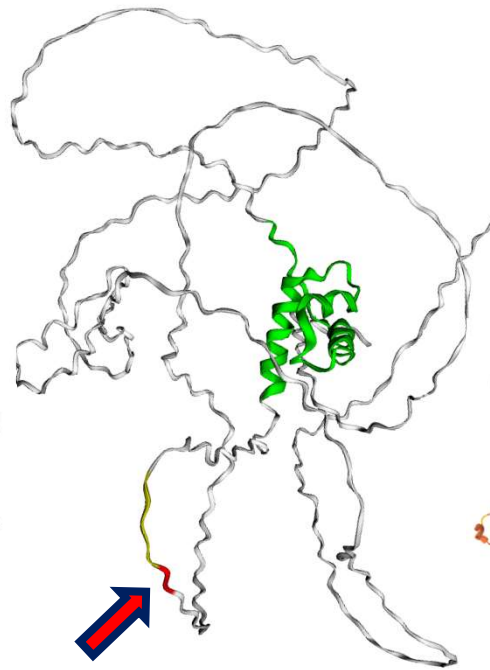**D**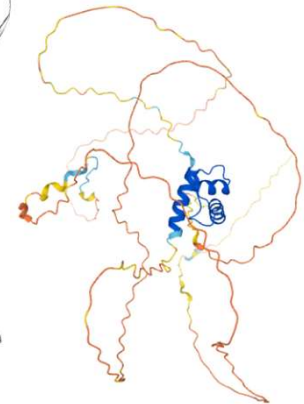

**Figure S2. Structural models of the AtKan1 protein** (A) Sequence of AtKan1. A predicted homeodomain-like DNA binding domain is underlined in green. Letters highlighted in yellow correspond to the P6 to P1' positions of the predicted cleavage site with the P1 and P1' positions underlined in red. (B-D) Structural model of AtKan1 predicted using Phyre2 (B, see Materials and Methods) or AlphaFold (C, PDB file of the model available at <https://www.alphafold.ebi.ac.uk/>). For both models, the color scheme is as follows: homeodomain-like DNA binding domain in green, P6 to P2 positions of the predicted cleavage site in yellow and P1 to P1' position of the cleavage site in red. The position of the cleavage site is highlighted with the red arrow. The degree of confidence in the Phyre 2 model (B) varied with the domains of the protein. The predicted homeodomain-like DNA binding domain was modeled with a very high degree of confidence (99.9%) based in part on the solved structure of a similar domain from the myb2 domain of phosphate starvation response regulator 1 (pdb: 6J5B). Other regions of the protein were predicted to be mostly disorganized and the 3D structure of these regions could only be modeled *ab initio* with a low degree of confidence. The degree of confidence in the AlphaFold model (C) also varied with the region of the protein, as shown in (D) and using the following color scheme: dark blue (more than 90 %), light blue (70-90 %), yellow (50-70%) and orange (less than 50%). In both models, the cleavage site is in a region of the protein predicted to be disorganized.

**A** >PpP100

MIVISRAAEDDLSPVGVGRFHPTDEELVTHYLKKKLKGMDSHVSNIREIDILKFEPWDLPEPERSLLKSDDENWFFFSRPEYNKHK  
 KNRTTOEGFWKITGREHOIKARDSRSVIGRKRILTFYRGRVRSSEERTNWMHEYYIPNDNPNNAORDFVLCRLKKNVKKSDENADV  
 AATCDEGETHNASDVENQQVNDMNMEDNRPPENLDYFERERDRLLANSLSNNDHNAFPTEFSANDQEFRLTLIVEPQSRETSDDTD  
 REPVYHOSLQMRCEPQIPYELLYGSSQSRRTDVLHNLRSQASSSVNVASKAGTYQREHRPQQSGPIIVFRDTSADEYYTR  
 EKTRRITYPEKPKPEKPKPKPEKPEKPEYPRTAADFPKQISITKSSIDKKVPQGSMEQTQNRTPRNVKGSFITWQTSPLTS  
 PPSVYIFNTVLGAILFLFCVREVVLYGEWC

**B**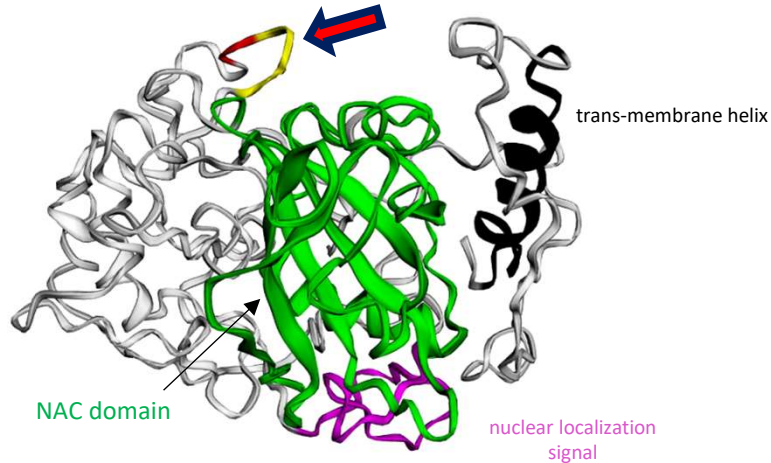**C**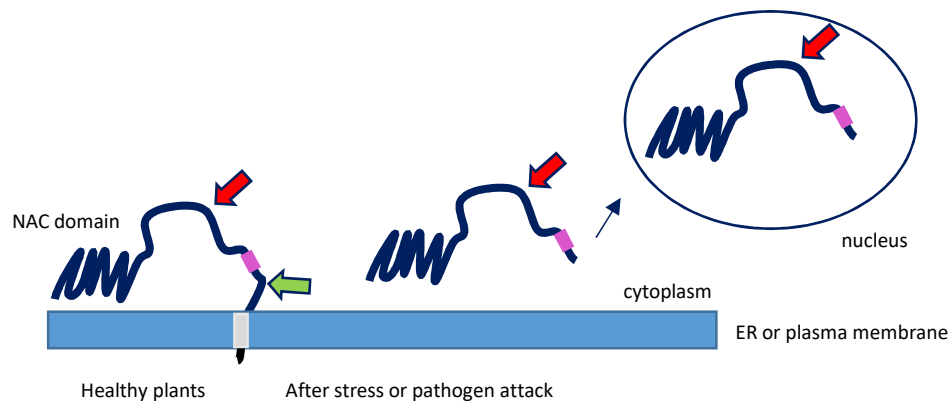

**Figure S3. Structural model of the PpP100 protein** (A) Sequence of PpP100. A predicted NAC domain is underlined in green. Predicted nuclear localization signal and trans-membrane helix are highlighted in pink and grey, respectively. Letters highlighted in yellow correspond to the P6 to P1' positions of the predicted cleavage site with the P1 and P1' positions underlined in red. (B) Structural model of Pp100 predicted using Phyre2 (see Materials and Methods). The degree of confidence in the model varied with the region of the protein. A predicted NAC domain (highlighted in green) was modeled with a very high degree of confidence (100%) based in part on the solved structure of the stress-induced transcription factor *nac1* of rice (pdb: 3ULX). With the exception of the putative trans-membrane helix, other regions of the protein (including the putative nuclear localization signal in pink) were predicted to be mostly disorganized and the 3D structure of these regions could only be modeled *ab silico* with a low degree of confidence. The position of the predicted cleavage site (P6 to P2 position highlighted in yellow; P1 and P1' positions highlighted in red) is shown with the red arrow. The cleavage site is in a region of the protein predicted to be disorganized. (C) Topology model of the PpP100 protein in association with the plasma or ER membrane. A putative trans-membrane helix is shown in grey and a putative nuclear localization signal is shown in pink. The protein is predicted to be anchored to the membrane under normal conditions. Cleavage by a plant protease (shown with the green arrow) under stress conditions (including pathogen attack) would release the protein which would then be translocated into the nucleus. The putative Nla protease cleavage site is located between the NAC domain and the nuclear localization signal and may prevent translocation to the nucleus. Alternatively, cleavage of PpP100 could also occur in the nucleus.

**A** >PpDDB

```

MDSGSGSMQSSSGDDEYDSRAESISALLSNPPSQLGHMSSHAPHHHHHHHQTHHLDPLSNMFDPLSSRLTNP
LLNFDMAWSKTLRSDPNPTDLGGLSQPFLTNPINQLGQSRGGGGGGSSFAALQIPHdqNVSASSAPNNQTHNI
NSNSNNNSNSNGVVRNPKRSRASRRAPTTLVLTDTNFRAMVQEFTGIPAPPFTSSSPFPRSLDLFSSAAAASALM
RSAGGGGGGGGGGLGLEPSPPSYLLRPFQKSHQPPSSSSILDHPNLPSTNSATNHHNNLLNMQQNPSPSSAVLN
FQSLFQPQHQQQPKYSLPINSNDLLASKTPHHHHHQSLDHFGLTQQQLNVLPNIVSSSDAALSRHDSNSNWNGT
GPSNNKTNIDNNVDHCGLMRSINGNYGNGKLNYSAGSSSNNI IHGDKAQDNVAAAAARSEGMVESWICSSD

```

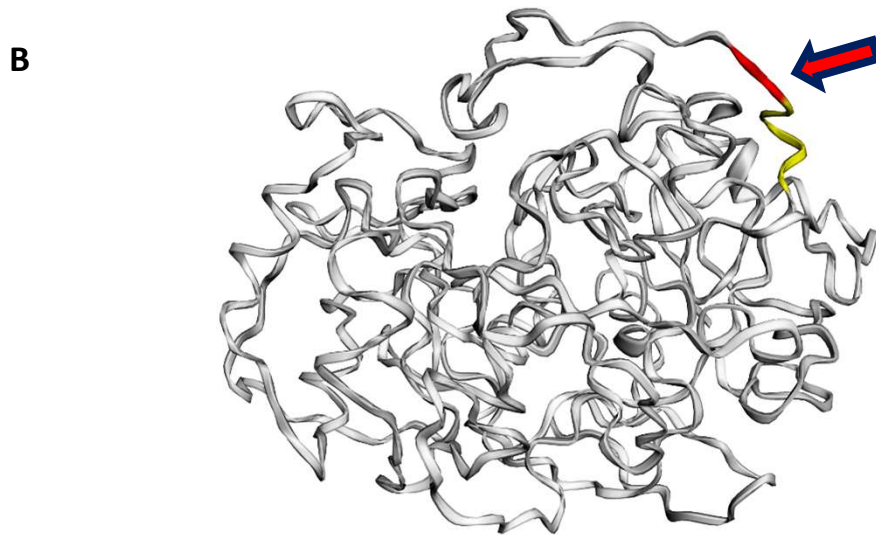

**Figure S4. Structural model of the PpDDB protein. (A)** Sequence of PpDDB. Letters highlighted in yellow correspond to the P6 to P1' positions of the predicted cleavage site with the P1 and P1' positions underlined in red. **(B)** Structural model of PpDDB predicted using Phyre2 (see Material and Methods). This protein is predicted to be highly disorganized and its 3D structure could only be modeled *ab initio* with a very low degree of confidence. The position of the predicted cleavage site (P6 to P2 position highlighted in yellow; P1 and P1' positions highlighted in red) is shown with the red arrow.



## A >AtGPI-AAL

```
MRPAIPLDYAVFQLSPKRSRCEL FVSTTGNT EKLASGLVKPFVAHLKVAEEQVSREVSIRLEVESNKNAGTWFTKGT LERFVRFVSTPEV  
LELVSALDVEMSQLAARKIYGE GTS DQRSSAKDSTDTT PAADVTKKELLKAI DLRLAAVRODLATACNRASAAGFNPI TVSEL SOFADR  
GANRLNEACTKFI TLCQRPELMSSWRVNQEEEAIRSSWESDMSIDDPSEDP SRDLATNRNQHQHREYQTMEEQ SATGTSYCQHESKLPQ  
SSHDEDEEEEEKSTVQNEPLVSQPRQLTRRLSVQERI SMFENKQKENS GEKTAVAKSTELKRLSSDLSSSAGMEKVVVRRWSGASDMSIDL  
GNDRKDDTGDSP LCTPSSSSVSKDGS GASSKQFVGYNKKEQNGLSHAANPHRNEEECTSNNGGDWGMDEVESQNSSSSTFLPKDKEVDLNVF  
FRITNNQVRHOGNSPDRYLEKNSKYKFHEKNPRASSDYTG NAINDDANNQMSDFISNRQNIQFRDPQSHSLSTLQQLGGTEPIITSVQSN  
GVTAESPRKELMPSDRQSP LLEDRQRKTPFSGGSEQMKRPHSRPEMGSAAVNTKPSAAINSVSDISESDTLIQVSPTEQVQRARPSKGSQ  
ELNDELKVKANELEKLF AEHMLRVPGDQSSSVRRGKPGKPEQAVTSQLRRPVAQDLSSVQISDQKTLAMPTLT SNDEDKFKTPPTMKMVV  
TKDYGDTRQNFP EISFSDNSRGK FYEQYMQKRD AKLKEDWSCRTEKEAKLKVMQDILDRSNAEMKTKFSQSTGRRDSSARRAEKLVYFN  
SKLSAKKDQHP I S SFQSE EDEDGSRSTQNKKLQQNKNNLLIARTTATSASRSAAKVSTLSAVRRRGQSEKHFAQSVPNFSEIKKEGMPAS  
GVGKNGVRTQVRSSIRPKAVNEEEKLRPKIFRKGAEEAEELATDFSQLKSE DGVSVP LYLEQE QSGRNFNSHG TGISSDNAQLKASEESE  
ASDDMEKEGMGEALDDTEVEAFTDAENEMPRLSQESEEWGSTGVANGESFSQLDAGSNTELPAAAMASRHQTMGSI L DSPGESTS PWNRSVK  
HRYPNEASELDASVDSVPGSPAFWNFSSLNHTESDTTQMRKKWGAAQKRAAGGNPSQNQCQDVTKGLKRLLNFGKRNRAAESLADWISAT  
TSEGDDDDTDGRDLANRSED LRKSRMGFLQSHPSGDSFNESEL FTEHVQT TGTPLSFKLKEDQTTGASVKAPRSFFSLSNFRSKGK
```

B

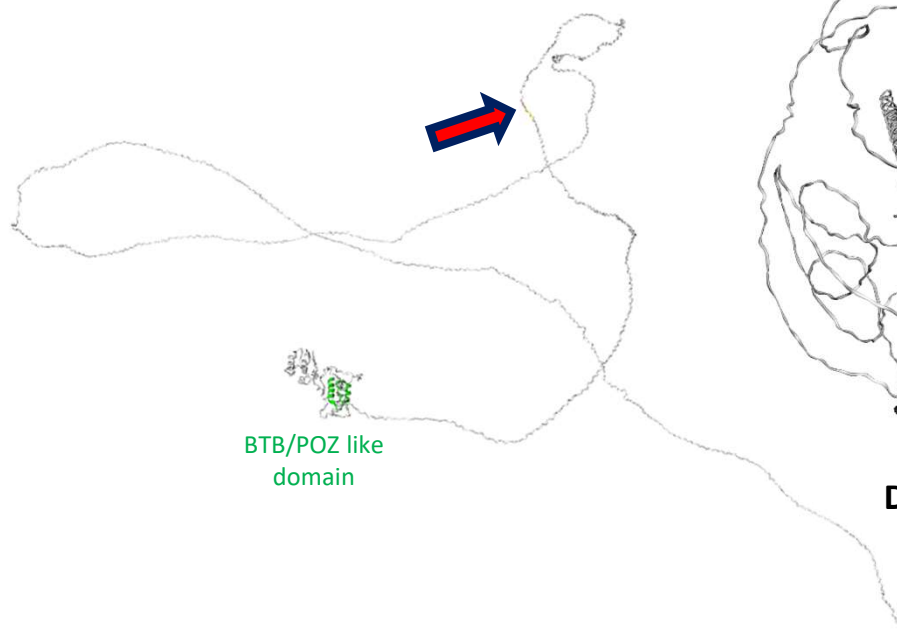

C

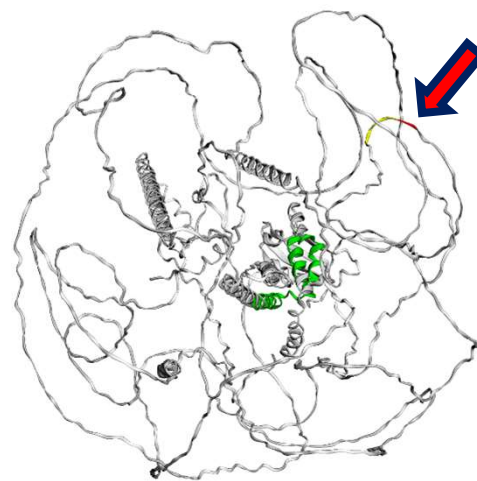

D

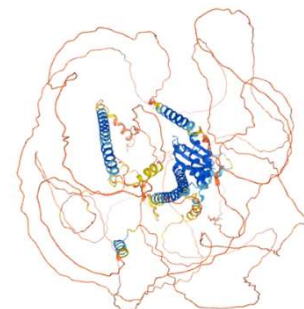

**Figure S5. Structural models of the AtGPI-AAL protein** (A) Sequence of AtGPI-AAL. A predicted BTB/POZ-like domain is underlined in green. Letters highlighted in yellow correspond to the P6 to P1' positions of the predicted cleavage site with the P1 and P1' positions underlined in red. (B-D) Structural models of AtGPI-AAL predicted using Phyre2 (B, see Materials and Methods) or AlphaFold (C, PDB file of the model available at <https://www.alphafold.ebi.ac.uk/>). For both models, the color scheme is as follows: BTB/POZ like domain in green, P6 to P2 positions of the predicted cleavage site in yellow and P1 to P1' position of the cleavage site in red. The position of the cleavage site is highlighted with the red arrow. The degree of confidence in the Phyre 2 model (B) varied with the domains of the protein. The predicted BTB/POZ-like domain (in green) was modeled with a very high degree of confidence (94.8%) based in part on the solved structure of the human speckle-type poz protein btb domain (pdb: 4J8Z). Other regions of the protein were predicted to be mostly disorganized and the 3D structure of these regions could only be modeled *ab silico* with a low degree of confidence. The degree of confidence in the AlphaFold model (C) also varied with the region of the protein, as shown in (D) and using the following color scheme: dark blue (more than 90%), light blue (70-90%), yellow (50-70%) and orange (less than 50%). In both models, the cleavage site is in a region of the protein predicted to be disorganized.

**A** >PpSLK2

MPPKRKQYQWHFGAAPQPALKNHSLNGGEQEPLTSSQRHNKPRIDVKKEASLNKHAIQQLLQSQDSEELQRNKLQIQELFH  
 YNMSQNQDQPKILHPSLQLKGDDEKQQQPMRHVVTTQQEVVHOASVMQLPDEGVCSRRLMOYIYHLRNRPADNNLSYWRKFVA  
EYYAPSAKRRWCLSSYDEVGRDALGILPHLTMVPWOCNICGCKSRRGFEAYFEVLPRLNEITFGSGVIDELFLDLPREIRFP  
SGVMMEYGRAVOESVYQOLHVVEGQLRIVFSDHLKILSWEFVCVSHEVFFRRTAVAPQVVQLVHAVODYKCSIDDRGSDGV  
LFODVOANCNRI LAAGGOLAKTVDOOLVDDLGFASKRYTRCLOIAEIVYTMKDLMLCODNVTGPIESLESYCRGAAMTKLQKQ  
 EIKGKEQLESARDPPKDNKMLMAASCGRSNTNESSPMHKLSTSAELAASLLRGSHHKLMGQSNLTSIVSRASQEPHIQDT  
 SSEPFQGPRTSNPGLIKSSVENGLSSLDSSMKQYAIQKLVQEMINNRSRANKHDREPIWGSKGSVIELPSGVWGCPTAAA  
 AQGNVFNISAGRTSSSKAAFNGNSSEVHTNDCFINGEPNLSGKLCLEPESIVNISHGYHDHNSIYNGNDVGYGWKV

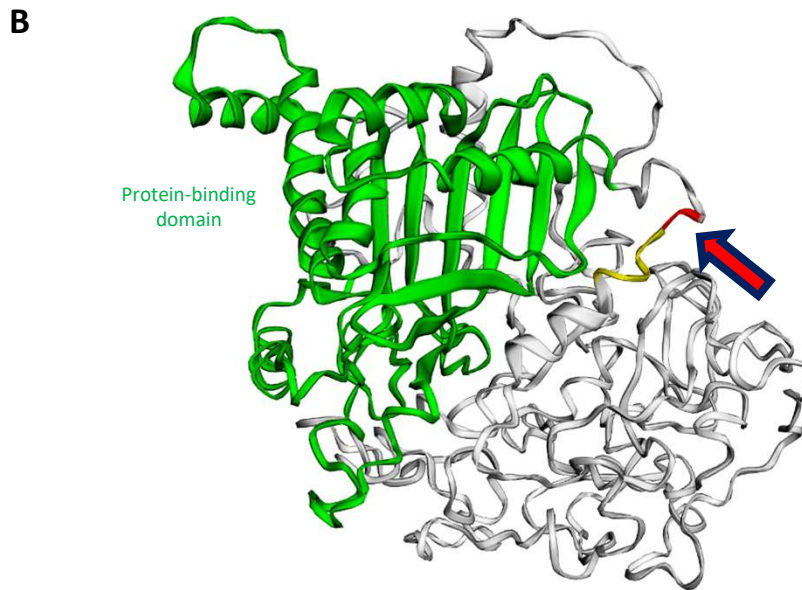

**Figure S6. Structural model of the PpSLK2 protein** **(A)** Sequence of PpSLK2. A predicted protein-binding domain is underlined in green. Letters highlighted in yellow correspond to the P6 to P1' positions of the predicted cleavage site with the P1 and P1' positions underlined in red. **(B)** Structural model of PpSLK2 predicted using Phyre2 (see Material and Methods). The degree of confidence in the model varied with the region of the protein. A predicted protein-binding domain (in green) was modeled with a very high degree of confidence (100%) based in part on the solved structure of the human Idb1 protein in complex with ssb2 (pdb: 6TYD). Other regions of the protein were predicted to be mostly disorganized and the 3D structure of these regions could only be modeled *ab initio* with a low degree of confidence. The position of the predicted cleavage site (P6 to P2 position highlighted in yellow; P1 and P1' positions highlighted in red) is shown with the red arrow. The cleavage site is in a region of the protein predicted to be disorganized.

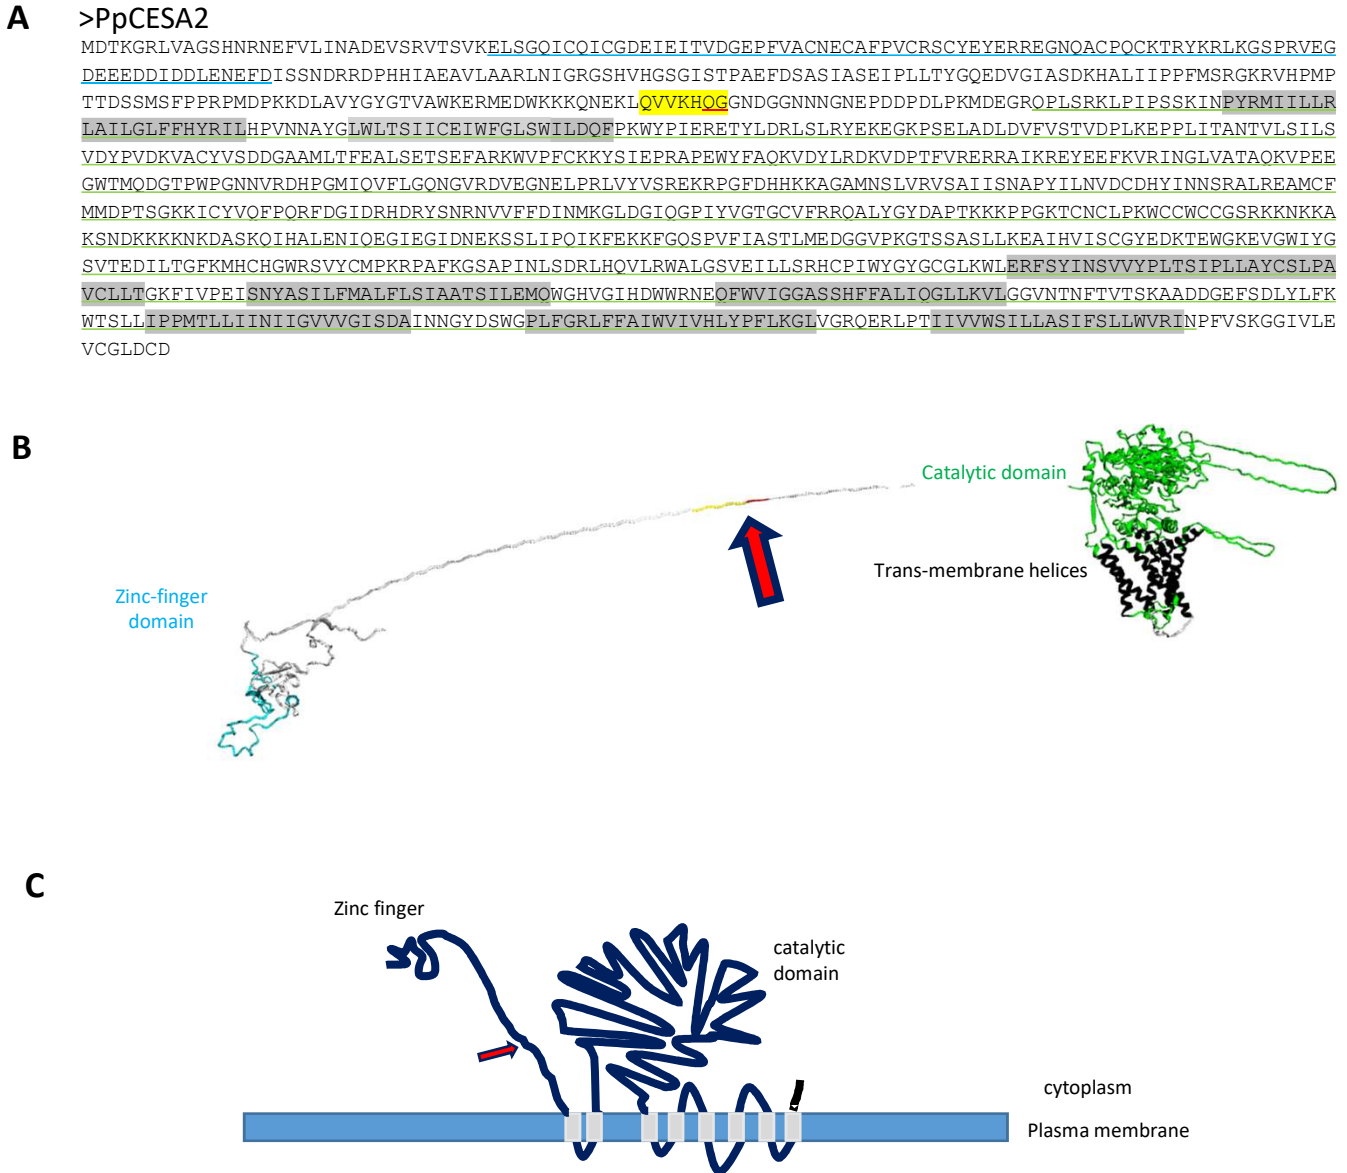

**Figure S7. Structural model of the PpCESA2 protein** (A) Sequence of PpCESA2. Predicted zinc-finger domain and catalytic domain are underlined in blue and green, respectively. Grey shadings correspond to predicted trans-membrane helices. Letters highlighted in yellow correspond to the P6 to P1' positions of the predicted cleavage site with the P1 and P1' positions underlined in red. (B) Structural model of PpCESA2 predicted using Phyre2 (see Material and Methods). In this model, 74% of the residues were modeled at a very high degree of confidence (100 %) based in part on the solved structure of the homotrimeric poplar cellulose synthase isoform 8 (pdb: 6WLB). Regions predicted with this high degree of confidence include the zinc-finger domain (in blue), the catalytic domain (in green) and 8 transmembrane helices (in black) . The position of the predicted cleavage site (P6 to P2 position highlighted in yellow; P1 and P1' positions highlighted in red) is shown with the red arrow. The cleavage site is in a flexible linker between the zinc-finger domain and the catalytic domain. (C) Topology model of the PpCESA2 protein in association with the plasma membrane. Trans-membrane helices are shown in grey. In this model, large portions of the protein (including the predicted cleavage site) are predicted to be on the cytoplasmic face of the membrane.

**A** >AtPIF7

MSNYGVKELTWENGQLTVHGLGDEVEPTTSNNPIWTQSLNGCETLESVVHQAALQQPSKFQLQSPNGPNHNYESKDGSCSRKR  
 GYPQEMDRWFVAVQEESHVRVGHSVTASASGTNMSWASFESGRSLKTARTGDRDYFRSGSETQDTEGDEQETRGEAGRSNGRRGR  
 AAAIHNESERRRRDRINQRMRTLQKLLPTASKADKVSILDDVIEHLKQLQAQVQFMSLRANLPQQMMIPQLPPPQSVLSIQHQ  
 QQQQQQQQQQQQQQQFQMSLLATMARMGMGGGGNGYGLVPPPPPPMMPVPMGNRDCTNGSSATLSDPYSAFFAQTMNMDL  
 YNKMAAAIYRQQSDQTTKVNIGMPSSSSNHEKRD

**B**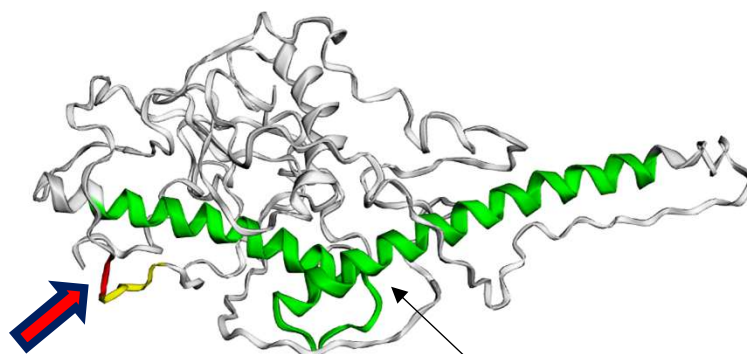

Helix-loop-helix  
DNA binding  
domain

**C**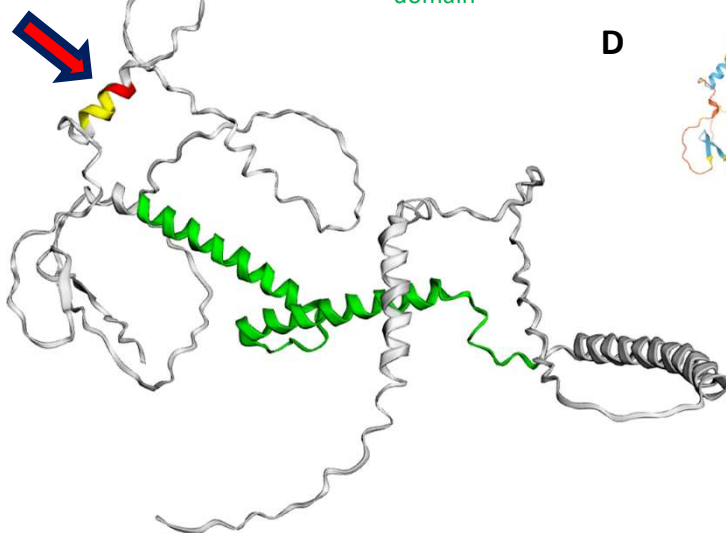**D**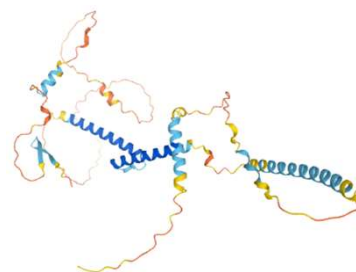

**Figure S8. Structural models of the AtPIF7 protein** (A) Sequence of AtPIF7. A predicted helix-loop-helix DNA binding domain is underlined in green. Letters highlighted in yellow correspond to the P6 to P1' positions of the predicted cleavage site with the P1 and P1' positions underlined in red. (B-D) Structural models of AtPIF7 predicted using Phyre2 (B, see Materials and Methods) or AlphaFold (C, PDB file of the model available at <https://www.alphafold.ebi.ac.uk/>). For both models, the color scheme is as follows: helix-loop-helix DNA binding domain in green, P6 to P2 positions of the predicted cleavage site in yellow and P1 to P1' position of the cleavage site in red. The position of the cleavage site is highlighted with the red arrow. The degree of confidence in the Phyre 2 model (B) varied with the domains of the protein. The predicted helix-loop-helix DNA binding domain was modeled with a very high degree of confidence (99.7%) based in part on the solved structure of a similar domain from transcription factor myc2 (pdb: 5GNJ). Other regions of the protein were predicted to be mostly disorganized and the 3D structure of these regions could only be modeled *ab silico* with a low degree of confidence. The degree of confidence in the AlphaFold model (C) also varied with the region of the protein, as shown in (D) and using the following color scheme: dark blue (more than 90 %), light blue (70-90 %), yellow (50-70%) and orange (less than 50%). The positioning of the cleavage site differed in the two models. It was located on a flexible region of the protein in the Phyre2 model, while the AlphaFold model placed the cleavage site within an  $\alpha$ -helix.

**A**

&gt;AtFbKr

MKRLPLHLLDEILFNLDPKSLGKMRCTNKSINTHISDDPNFKFEYFSRIGSSLLHISKVGSKFLCFYPYAIRLFKNMT  
PLKNLCNILGSCSGLVLLSINGILCVANPLTKKFRFLHYSIWGNETWIGFAVDQIDRATQRFKIVFISEQLEVSNPYET  
TYQFRINTGESWSLSKTTITCRASNLKKGKNSKPVYVNGDLHWLRKDGSIVAFNPETEKARLIQSQFNRKPGKLLLCTG  
DNRLTLISATDAVISVYALETDGQWILVRWIKNEVVHQSLPLLYWNVQAYDGKCLLVRMMSLVGSVIHRYDLRANKWRV  
LGSIPTWCADRDFFLFKPSWSSVIGLLDQEHVHVLMPMPMPMPMPMPMPMHMHMHMPMPMAMPMPMPIAMAMPMPM  
PMPMPMPMTKTETETVTRSEVISSVMAIMGLVNRTLSFIN

**B**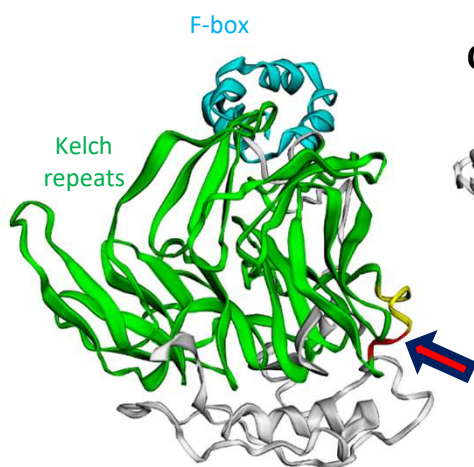**C**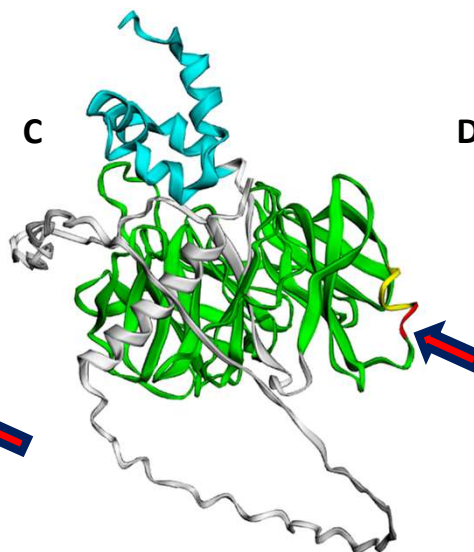**D**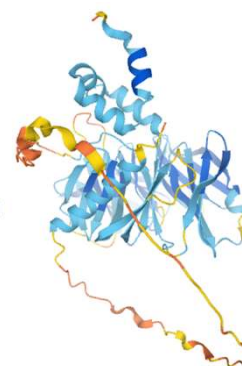

**Figure S9. Structural models of the AtFbKr protein** (A) Sequence of AtFbKr. Predicted F-box and Kelch repeats are underlined in blue and green, respectively. Letters highlighted in yellow correspond to the P6 to P1' positions of the predicted cleavage site with the P1 and P1' positions underlined in red. (B-D) Structural models of AtFbKr predicted using Phyre2 (B, see Materials and Methods) or AlphaFold (C, PDB file of the model available at <https://www.alphafold.ebi.ac.uk/>). For both models, the color scheme is as follows: Kelch repeats in green, F-box in blue, P6 to P2 positions of the predicted cleavage site in yellow and P1 to P1' position of the cleavage site in red. The position of the cleavage site is highlighted with the red arrow. The degree of confidence in the Phyre 2 model (B) varied with the domains of the protein. The predicted F-box and kelch repeat domains (highlighted in blue and green, respectively) were modeled with a very high degree of confidence (99.4%) based in part on the solved structure of f-box/wd repeat protein 7 within the *skp1-fbw7-cyclindegc* complex (pdb: 2OVQ). Other regions of the protein were modeled *ab silico* with a low degree of confidence. The degree of confidence in the AlphaFold model (C) also varied with the region of the protein, as shown in (D) and using the following color scheme: dark blue (more than 90 %), light blue (70-90 %), yellow (50-70%) and orange (less than 50%). In both models, the cleavage site is located at the base of the highly structured kelch-repeat domain.



**A** >PpRHLP

MTVPKTVKDIOSLTGRVAALTRFISKATDRCAPFFKALKGTKRNIWTAECDTAFSELKEYMGRAPLLSTPEH  
GDIHVIYLSISASAVSSVLIIRSKDNAEHPVHYVSKALODAEVRYPDIEKLAFALVVSARLRPYFOAHTIYVL  
TNOPLGOVLONPETSGRVLVKWAIELGEFDIHYKPRPAMRGOAVADFLSEFTNPOASAATOLITEPNPPPSODO  
TPTEGNLDLTOPLWTLFVDGSSNAOGCGAGLVLSLDKVALEYALRFKFOASNNEAEYEALLAGLRLAKEMDA  
ROILIFSDSOLVVHVNODFTAKDASMTAYLOHARHLLATFHAHSIKOVPRSENSHADALARLASALEQGMGR  
HIHIEFLAQPSTQAPLICTIDHSPTWMDPILQFLQNQTLPANPAEARRVRHRSARYLIINGSLYNRGFSLPYL  
RFLTPEEGHYVLRREIHEGICGNHSGTRSLAHKGNPPRILLAIAPH

**B**

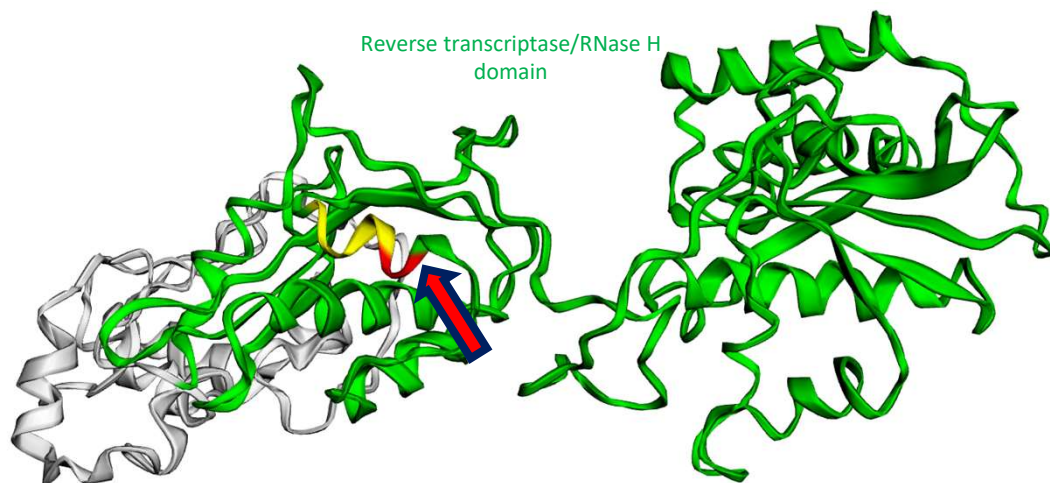

**Figure S10. Structural model of the PpRHLP protein (A)** Sequence of PpRHLP. A predicted reverse transcriptase/RNase H domain is underlined in green. The letters highlighted in yellow correspond to the P6 to P1' positions of the predicted cleavage site with the P1 and P1' positions underlined in red. **(B)** Structural model of PpRHLP predicted using Phyre2 (see Material and Methods). The degree of confidence in the model was high with 87% of residues modelled at 100% degree of confidence based in part on the solved structure of the human immunodeficiency virus-2 reverse transcriptase (pdb: 1MU2). The position of the predicted cleavage site (P6 to P2 position highlighted in yellow; P1 and P1' positions highlighted in red) is shown with the red arrow. The cleavage site is located within an  $\alpha$ -helix in the middle of the highly structured reverse transcriptase/RNase H domain.

**A** >AtPRC

MCNCSFFCCLPVLNARLVKPNSETCRWRLKRIQHSILNCFWIDSKNSPFLGQFSFIEKPRDNFICLSSSLNSNE  
EDVVHOTVGSDSVELPGESDLVRLVGDNDLSITGSRGFKQSTTRSNLVAKOVVSIOSALSSLGFISOLWVDTTSWLV  
LVVDVKPSLLSGESERFLLTDIVRVGDVVLVDNETVLDTEFKMVGLETLVGYRVVTPGGRNIGKVRGYSFNINSGI  
VESLELDSFGVTIIPSSLVSTYRLDVEDIEVLODIVVVOEDAASRKORLTKGLWDAQFDSEYPDVEDLESSDRR  
RRRRNRSNRKKRDLDDDEWDIFR

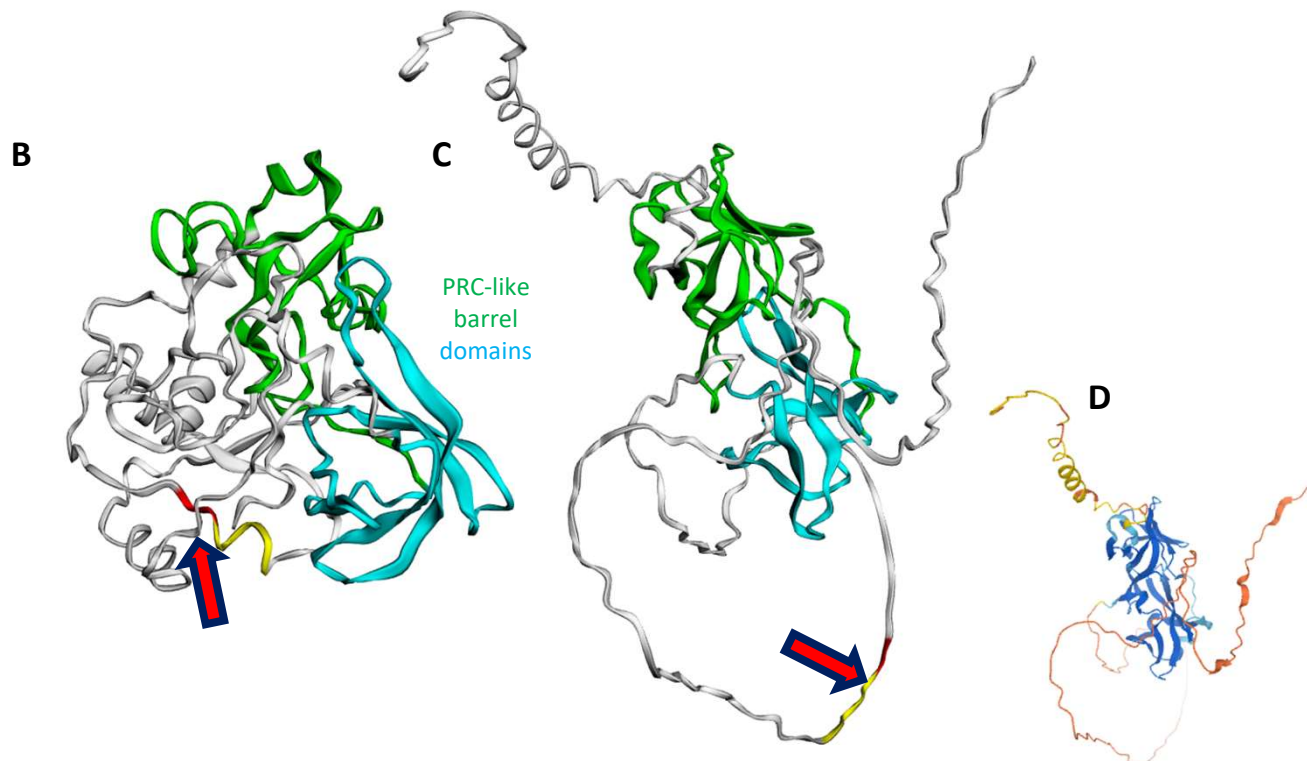

**Figure S11. Structural models of the AtPRC protein** (A) Sequence of AtPRC. Tandem PRC-like barrel domains are underlined in blue and green. Letters highlighted in yellow correspond to the P6 to P1' positions of the predicted cleavage site with the P1 and P1' positions underlined in red. (B-D) Structural models of AtPRC predicted using Phyre2 (B, see Materials and Methods) or AlphaFold (C, PDB file of the model available at <https://www.alphafold.ebi.ac.uk/>). For both models, the color scheme is as follows: tandem PRC-like barrel domains in blue and green, P6 to P2 positions of the predicted cleavage site in yellow and P1 to P1' position of the cleavage site in red. The position of the cleavage site is highlighted with the red arrow. The degree of confidence in the Phyre 2 model (B) varied with the domains of the protein. The predicted tandem PRC-like domains were predicted with a very high degree of confidence (98.1%) based in part on the solved structure of a PRC-barrel domain protein from *Rhodospseudomonas palustris* (pdb: 3HTR). Other regions of the protein (including the region of the predicted cleavage site) were modeled *ab silico* with a low degree of confidence. The degree of confidence in the AlphaFold model (C) also varied with the region of the protein, as shown in (D) and using the following color scheme: dark blue (more than 90%), light blue (70-90%), yellow (50-70%) and orange (less than 50%). The position of the cleavage site differed in the two models. In the Phyre2 model, the cleavage site is located within a weakly predicted putative  $\alpha$ -helix in an otherwise disorganized region of the protein. In the AlphaFold model, the cleavage site is located in a region of the protein predicted to be generally disorganized.
